# Supplementary material for: Mapping Genes Influencing Type 2 Diabetes Risk and BMI in Japanese Subjects
Source: Oxford University Press journal article supplement (doi:10.2337/diabetes.52.1.209), 2003-01-01
Supplement: 209-sup-onlineappendix.doc [file 209-sup-onlineappendix.doc]

**Online Supplement**

| TABLE A1  Sibship structure of 164 Japanese families | | | | |
| --- | --- | --- | --- | --- |
| Number in sibship | Number of such sibships | Number of people | Possible pairs per sibship | Total possible pairs |
| 2 | 134 | 268 | 1 | 134 |
| 3 | 22 | 66 | 3 | 66 |
| 4 | 6 | 24 | 6 | 36 |
| 5 | 2 | 10 | 10 | 20 |
| Total | 164 | 368 | - | 256 |

| TABLE A2  Clinical characteristics of 368 Japanese subjects with type 2 diabetes | |
| --- | --- |
| Men/Women | 180/188 |
| Age at time of study (years) | 58.8 ± 10.1 |
| Age at diagnosis (years) | 45.2 ± 10.9 |
| Current BMI (kg/m2) | 23.0 ± 3.0 |
| Maximum BMI (kg/m2) | 26.4 ± 3.8 |
| HbA1c (%) | 7.7 ±1.7 |
| Fasting plasma glucose (mg/dl) (n=248) | 151.5 ± 46.8 |
| Fasting insulin (µU/ml) (n=161) | 8.0 ± 4.1 |
| Fasting C-peptide (ng/ml) (n=61) | 1.4 ± 1.6 |

We have no information on the prevalence of smoking in these subjects or its possible effect on current or maximum BMI.

Data are mean ± SD

| TABLE A3  Regions showing nominal evidence of linkage (*P*<0.05) with type 2 diabetes in other studies | | |
| --- | --- | --- |
| Chr. | Location (cM) | Study (Reference) |
| 2 | 169.9 | Indigenous Australians (1) |
|  | 236.8 | Asian (Han Chinese) (2)  Asian (Japanese) (3) |
| 4 | 104.9 | Asian (Han Chinese) (2)  Asian (Japanese American) (4) |
| 5 | 114.8 | Asian (Japanese American) (4) |
| 6 | 42.3 | Asian (Han Chinese) (2)  Asian (Japanese) (3) |
| 8 | 15.3 | Oji-Cree Indians (5)  Caucasian (British) (6)  Caucasian (Askenzai Jewish) (7)  Asian (Japanese American) (4) |
| 17 | 36.1 | Caucasian (British) (6)  Caucasian (Finnish, Botnia) (8) |
| 21 | 48.0 | Caucasian (USA) (4) |

| TABLE A4  Multipoint linkage results of three genome wide scans for type 2 diabetes susceptibility genes in Japanese and regions showing nominal evidence of linkage (*P*<0.05) | | | | | | |
| --- | --- | --- | --- | --- | --- | --- |
|  | Iwasaki et al. (this study)  (168 families, 256 ASPs) | | Mori et al. (Ref. 3)  (159 families, 224 ASPs) | | Ehm et al. (Ref. 4)  (18 families, 45 ASPs) | |
| Chr. | Location  (cM) | LOD | Location  (cM) | LOD | Location  (cM) | LOD |
| 1 | 29.9 | 0.77 |  |  |  |  |
|  |  |  | 57.1 | 1.53 | 67.9 | 0.80 |
|  |  |  |  |  | 141.4 | 1.01 |
| 2 |  |  |  |  | 29.3 | 0.66 |
|  |  |  |  |  | 64.6 | 0.99 |
|  |  |  |  |  | 143.7 | 1.58 |
|  | 169.6 | 0.99 |  |  |  |  |
|  | 236.8 | 0.81 | 233.9 | 1.68 |  |  |
| 3 |  |  |  |  | 102.0 | 1.03 |
|  |  |  | 216.7 | 1.38 |  |  |
| 4 | 104.9 | 0.79 |  |  | 120.0 | 0.93 |
| 5 |  |  |  |  | 52.9 | 0.82 |
|  | 114.1 | 0.67 |  |  | 102.5 | 0.98 |
|  |  |  |  |  | 179.6 | 1.61 |
| 6 | 42.2 | 0.69 | 23.8 | 1.52 |  |  |
| 7 |  |  | 10.3 | 1.80 |  |  |
|  |  |  |  |  | 1.77 | 0.97 |
| 8 | 15.3 | 0.73 |  |  | 16.6 | 1.75 |
|  | 93.3 | 0.62 |  |  |  |  |
|  |  |  |  |  | 127.2 | 0.64 |
| 9 |  |  |  |  | 5.6 | 1.01 |
|  | 136.5 | 1.40 |  |  |  |  |
| 10 |  |  |  |  | 46.6 | 1.28 |
|  |  |  |  |  | 133.1 | 1.06 |
| 11 |  |  | 54.2 | 3.08 |  |  |
|  | 131.6 | 0.71 |  |  |  |  |
| 12 |  |  |  |  | 0.0 | 0.68 |
| 13 |  |  |  |  | 16.9 | 0.79 |
|  |  |  |  |  | 71.0 | 0.60 |
| 15 |  |  |  |  | 7.0 | 0.62 |
|  |  |  | 42.7 | 2.19 |  |  |
| 17 | 36.1 | 0.67 |  |  |  |  |
|  |  |  |  |  | 1.20 | 0.95 |
| 20 |  |  | 66.2 | 1.67 |  |  |
|  |  |  |  |  | 97.3 | 0.70 |
| 21 | 48.0 | 1.92 |  |  |  |  |
| X |  |  |  |  | 9.5 | 2.82 |
|  |  |  |  |  | 56.8 | 0.61 |
|  |  |  |  |  | 150.6 | 1.45 |

Iwasaki et al. and Mori et al. did not examine the X-chromosome for linkage with T2DM.

| TABLE A5  Regions showing nominal evidence of linkage (*P*<0.05) with BMI and BMI-related traits in other studies | | |
| --- | --- | --- |
| Chr. | Location (cM) | Study (Reference) |
| 2 | 167.9 | Pima Indian/% Fat (9) |
|  | 210.5 | Caucasian (USA)/visceral fat (10) |
| 3 | 185.7 | Pima Indian/waist-to-thigh ratio (9)  Caucasian (USA)/BMI (11)  African-American/BMI (12) |
| 5 | 131.9 | Caucasian (USA)/BMI (13) |
| 7 | 7.4 | Asian/BMI (14)  Asian (Japanese)/BMI (3)  Caucasian (French)/BMI (15) |
| 16 | 30.0 | Pima Indian/BMI (16) |
| 17 | 47.8 | Mexican-American/BMI (14)  Caucasian (USA)/waist-to-hip ratio (11) |

**References for online supplement**

1. Busfield F, Duffy DL, Kesting JB, Walker SM, Lovelock PK, Good D, Tate H, Watego D, Marczak M, Hayman N, Shaw JTE: A genomewide search for type 2 diabetes-susceptibility genes in indigenous Australians. *Am J Hum Genet* 70:349-357, 2002
2. Luo TH, Zhao Y, Li G, Yuan WT, Zhao JJ, Chen JL, Huang W, Luo M: A genome-wide search for Type II diabetes susceptibility genes in Chinese Hans. *Diabetologia* 44:501-506, 2001
3. Mori Y, Otabe S, Dina C, Yasuda K, Populaire C, Lecoeur C, Vatin V, Durand E, Hara K, Okada T, Tobe K, Boutin P, Kadowaki T, Froguel P: Genome-wide search for type 2 diabetes in Japanese affected sib-pairs confirms susceptibility genes on 3q, 15q, and 20q and identified two new candidate loci on 7p and 11p. *Diabetes* 51:1247-1255, 2002
4. Ehm MG, Karnoub MC, Sakul H, Gottschalk K, Holt DC, Weber JL, Vaske D, Briley D, Briley L, Kopf J, McMillen P, Nguyen Q, Reisman M, Lai EH, Joslyn G, Shepherd NS, Bell C, Wagner MJ, Burns DK and ADA GENNID Study Group: Genomewide search for type 2 diabetes susceptibility genes in four American populations. *Am J Hum Genet* 66:1871-1881, 2000
5. Hegele RA, Sun F, Harris SB, Anderson C, Hanley AJG, Zinman B: Genome-wide scanning for type 2 diabetes suceptibility in Canadian Oji-Cree, using 190 microsatellite markers. *J Hum Genet* 44:10-14, 1999
6. Wiltshire S, Hattersley AT, Hitman GA, Walker M, Levy JC, Sampson M, O’Rahilly S, Frayling TM, Bell JI, Lathrop GM, Bennett A, Dhillon R, Fletcher C, Groves GJ, Jones E, Prestwich P, Simecek N, Rao PVS, Wishart M, Foxon R, Howell S, Smedley D, Cardon LR, Menzel S, McCarthy MI: A genomewide scan for loci predisposing to type 2 diabetes in a U.K. population (The Diabetes UK Warren 2 Repository): Analysis of 573 pedigrees provides independent replication of a susceptibility locus on chromosome 1q. *Am J Hum Genet* 69:553-569, 2001
7. Permutt MA, Wasson JC, Suarez BK, Lin J, Thomas J, Meyer J, Lewitzky S, Rennich JS, Parker A, DuPrat L, Maruti S, Chayen S, Glaser B: A genome scan for type 2 diabetes susceptibility loci in a genetically isolated population. *Diabetes* 50:681-685, 2001
8. Lindgren CM, Mahtani MM, Widén E, McCarthy MI, Daly MJ, Kirby A, Reeve MP, Kruglyak L, Parker A, Meyer J, Almgren P, Lehton M, Kanninen T, Tuomi T, Groop LC, Lander ES: Genomewide search for type 2 diabetes mellitus susceptibility loci in Finnish Families: The Botnia study. *Am J Hum Genet* 70:509-516, 2002
9. Norman RA, Tataranni PA, Pratley R, Thompson DB, Hanson RL, Prochazka M, Baier L, Ehm MG, Sakul H, Foroud T, Garvey WT, Burns D, Knowler WC, Bennett PH, Bogardus C, Ravussin E: Autosomal genomic scan for loci linked to obesity and energy metabolism in Pima Indians. *Am J Hum Genet* 62:659-668, 1998
10. Rice T, Chagnon YC, Pérusse L, Borecki IB, Ukkola O, Rankinen T, Gagnon J, Leon AS, Skinner JS, Wilmore JH, Bouchard C, Rao DC: A genomewide linkage scan for abdominal subcutaneous and visceral fat in black and white families: The HERITAGE family study. *Diabetes* 51:848-855, 2002
11. Kissebah, AH, Sonnenberg GE, Myklebust J, Goldstein M, Broman K, James RG, Marks JA, Krakower GR, Jacob HJ, Weber J, Martin L, Blangero J, Comuzzie AG: Quantitative trait loci on chromosomes 3 and 17 influence phenotypes of the metabolic syndrome. *Proc Natl Acad Sci USA* 97:14478-14483, 2000
12. Zhu X, Cooper RS, Luke A, Chen G, Wu X, Kan D, Chakravarti A, Weder A: A genome-wide scan for obesity in African-Americans. *Diabetes* 51:541-544, 2002
13. Feitosa MF, Borecki IB, Rich SS, Arnett DK, Sholinsky P, Myers RH, Leppert M, Province MA: Quantitative-trait loci influencing body-mass index reside on chromosomes 7 and 13: The National Heart, Lung, and Blood Institute Family Heart Study. *Am J Hum Genet* 70:72-82, 2002
14. Wu X, Cooper RS, Borecki I, Hanis C, Bray M, Lewis CE, Zhu X, Kan D, Luke A, Curb D: A combined analysis of genomewide linkage scans for body mass index, from the National Heart, Lung, and Blood Institute family blood pressure program. *Am J Hum Genet* 70:1247-1256, 2002
15. Hager, J, Dina C, Francke S, Dubois S, Houari M, Vatin V, Vaillant E, Lorentz N, Basdevant A, Clement K, Guy-Grand B, Froguel P: A genome-wide scan for human obesity genes reveals a major susceptibility locus on chromosome 10. *Nat Genet* 20:304-308, 1998
16. Hanson RL, Ehm MG, Pettitt D, Prochazka M, Thompson DB, Timberlake D, Foroud T, Kobes S, Baier L, Burns DK, Almasy L, Blangero J, Garvey WT, Bennett PH, Knowler WC: An autosomal genomic scan for loci linked to type II diabetes mellitus and body-mass index in Pima Indians. *Am J Hum Genet* 1130-1138, 1998
